# Supplementary material
Source: PubMed Central journal article supplement (PMC4115499)
Supplement: 1323740111_pnas.1323740111.sapp.pdf [file 1323740111_pnas.1323740111.sapp.pdf]

# Supporting information for ‘Unspeciated organic emissions from combustion sources and their influence on the secondary organic aerosol budget in the United States’

Shantanu H. Jathar<sup>¶</sup>, Timothy D. Gordon<sup>§</sup>, Christopher J. Hennigan<sup>†</sup>, Havala O. T. Pye<sup>2</sup>, George Pouliot<sup>2</sup>, Peter J. Adams<sup>1</sup>, Neil M. Donahue<sup>1</sup>, and Allen L. Robinson<sup>1</sup>

<sup>1</sup> Center for Atmospheric Particle Studies, Carnegie Mellon University, 5000 Forbes Avenue, Pittsburgh, PA 15213

<sup>2</sup> U.S. Environmental Protection Agency, Research Triangle Park, NC 27711

<sup>¶</sup> Presently at Civil and Environmental Engineering, University of California, One Shields Ave, Davis, CA 95616

<sup>§</sup> Presently at National Oceanic and Atmospheric Administration Earth System Research Laboratory, Chemical Sciences Division, 325 Broadway, Boulder, CO 80304, USA and Cooperative Institute for Research in Environmental Sciences, University of Colorado, 216 UCB, Boulder, CO 80309, USA

<sup>†</sup> Presently at Department of Chemical, Biochemical and Environmental Engineering, University of Maryland, 1000 Hilltop Cir, Baltimore, MD 21250

Corresponding author: Allen L. Robinson, 5000 Forbes Avenue, Pittsburgh, PA 15213. Phone no: 412-268-3657, Email: [alr@andrew.cmu.edu](mailto:alr@andrew.cmu.edu)

## Experiments

Details of the experiments and experimental procedures are described in companion publications (1-5). Briefly, combustion emissions were handled into two stages. The primary emissions were characterized after the first stage of dilution; the smog chamber experiments of secondary organic aerosol (SOA) formation were performed after the second stage of dilution.

In the first stage, emissions were lightly (<20:1) diluted in a dilution tunnel (6, 7) or injected into a larger burn chamber (1). At these low levels of dilution the organic aerosol concentrations were typically greater than 100  $\mu\text{g}/\text{m}^3$  for the vehicle tests and greater than 1  $\text{mg}/\text{m}^3$  for the biomass burning experiments. Here, the mass of total organic gas was measured using a flame ionization detector calibrated with propane. Canister or bag samples were analyzed offline using conventional gas-chromatography techniques (1, 5). This analysis identified (speciated) emissions of single/double-ring aromatics and smaller (< $\text{C}_{12}$ ) alkanes (straight, branched and cyclic), alkenes and carbonyls (formaldehyde, acetaldehyde, etc). Organic carbon (or primary organic aerosol; POA) measurements were made using an OC/EC analyzer.

The second stage of dilution involved transferring emissions from the dilution tunnel or burn chamber into a smog chamber (1, 2, 4). This involved substantial additional dilution (~30:1) with clean air. Since the smog-chamber experiment (second stage) was run at a much higher dilution, some POA evaporated between the first and second stage, increasing gas-phase SOA precursor concentrations. The mass of evaporated POA was calculated as the difference between the dilution corrected POA between the two stages (6-8) and considered part of the unspeciated organic emissions. Inside the smog chamber the organic aerosol concentrations were representative of those typically found in urban areas or emission plumes (1 to 100  $\mu\text{g m}^{-3}$ ).

To initiate photo-oxidation, the smog chamber was exposed to natural or artificial sunlight. Inside the smog chamber, four to six different gas-phase organics were measured online with a proton transfer reaction mass spectrometer (PTR-MS); the decay of these organics and their reaction rates with the hydroxyl radical (OH) were used to calculate OH concentrations. Particle-phase measurements were made online with a scanning mobility particle sizer (SMPS) and aerosol mass spectrometer (AMS). Both SMPS and AMS measurements were used to estimate wall-loss corrected concentrations of POA and SOA. The measured SOA was defined as the increase in wall-loss corrected mass during the photo-oxidation phase of the experiment.

## Sources

Gasoline vehicles: Experiments were performed with 15 different light-duty gasoline vehicles recruited from the California in-use fleet (model years 1987 to 2011). The fleet was not designed to represent the distribution of vehicles in the current, in-use California fleet; instead, vehicles (from private owners located within 50 miles of the laboratory) were selected to span a wide range of model years, vehicle types, engine technologies and emission control technologies. All vehicles were port fuel injected except for one LEV-II, which was an early generation gasoline direct injection vehicle. For discussion, the vehicles are grouped based on model year: “pre-LEV” were vehicles manufactured prior to 1995; “LEV-I” vehicles were manufactured between 1995 and 2003; and “LEV-II” vehicles were manufactured 2004 or later. In this work, the LEV designation simply refers to a range of model years; it does not refer to the emissions certification standard. The certification standard and other details for each vehicle are listed in the table below. All of the vehicles were operated on the same California commercial summertime gasoline. Every vehicle was tested using the cold-start Unified Cycle (UC) driving schedule, which was designed to simulate driving patterns in Southern California. It has a similar three-bag structure as the Federal Test Procedure (FTP), but is a more aggressive cycle with higher speeds, higher acceleration, fewer stops per mile and less idle time. Additional details on the gasoline vehicle testing are in Gordon et al. (2).

| <b>Designation</b> | <b>Model Year</b> | <b>Vehicle Class</b> | <b>Engine Size (L)</b> | <b>Emission Standard</b> | <b>Mileage</b> |
|--------------------|-------------------|----------------------|------------------------|--------------------------|----------------|
| Pre-LEV            | 1987              | Passenger Car        | 4.1                    | Tier I                   | 197,631        |
| Pre-LEV            | 1988              | Passenger Car        | 1.6                    | Tier I                   | 224,758        |
| Pre-LEV            | 1990              | SUV                  | 5.0                    | Tier I                   | 58,617         |
|                    |                   |                      |                        |                          |                |
| LEV-I              | 1996              | Passenger Car        | 2.7                    | Tier I                   | 51,826         |
| LEV-I              | 1997              | Passenger Car        | 3.0                    | LEV                      | 130,485        |
| LEV-I              | 1998              | Passenger Car        | 3.0                    | LEV                      | 90,638         |
| LEV-I              | 1999              | Passenger Car        | 2.0                    | TLEV                     | 118,294        |
| LEV-I              | 2000              | Passenger Car        | 2.2                    | LEV I, ULEV              | 104,446        |
| LEV-I              | 2003              | Passenger Car        | 3.5                    | LEV I, NLEV              | 110,445        |
|                    |                   |                      |                        |                          |                |
| LEV-II             | 2007              | SUV                  | 3.9                    | LEV II                   | 29,433         |
| LEV-II             | 2008              | Light duty truck     | 4.2                    | LEV II                   | 43,378         |
| LEV-II             | 2008              | Passenger Car        | 3.5                    | LEV II                   | 35,786         |
| LEV-II             | 2010              | Light duty truck     | 3.6                    | ULEV; Tier II            | 18,236         |
| LEV-II             | 2011              | Passenger Car        | 2.0                    | ULEV                     | 10,911         |

|        |      |               |     |              |        |
|--------|------|---------------|-----|--------------|--------|
| LEV-II | 2011 | Passenger Car | 3.6 | LEV II, ULEV | 29,249 |
|--------|------|---------------|-----|--------------|--------|

Diesel Vehicles: Experiments were performed with three diesel vehicles without diesel particulate filters. One was a 2006 heavy-duty (class 8) diesel tractor equipped with a 10.8L, 6 cylinder, in-line, direct injection, turbocharged diesel engine. This tractor had been driven 94,000 miles at the time of testing. The heavy duty diesel vehicle experiments were conducted using the Urban Dynamometer Driving Schedule (UDDS), which represents urban operation of heavy duty diesel vehicles. There were two medium duty diesel vehicles (MDDV) that were full-sized pickup trucks with gross vehicle weight ratings between 8,500 and 9,500 lbs. One was a 2005 MDDV equipped with a 6.6L, V8 turbocharged engine and a diesel oxidation catalyst (DOC). This vehicle had been driven 65,934 miles at the time of testing. The other was a 2001 MDDV equipped with a 5.9L, 6 cylinder, in-line, turbocharged diesel engine with no after-treatment. This vehicle had been driven 158,850 miles at the time of testing. The MDDVs were tested using the cold-start Unified Cycle (UC). The vehicles were tested with a commercial ultra-low-sulfur diesel that met California specifications. Additional details on the diesel vehicle testing are in Gordon et al. (4).

Biomass Fuels: Experiments were performed as part of the FLAME-III study at the U.S. Forest Service Fire Science Laboratory (FSL) in Missoula, MT. The fuels are listed in the table below. The fuels represent different regions in North America commonly impacted by prescribed burning and wildfires, including the Southeast (e.g., gallberry and pocosin), southern California (e.g., sagebrush and chamise) and forest regions of the western United States and Canada (e.g., ponderosa pine, lodgepole pine, and black spruce). Additional details on the biomass burning experiments are in Hennigan et al. (1)

| <b>Fuel</b>    | <b>Name</b>                         | <b>Material</b>                           |
|----------------|-------------------------------------|-------------------------------------------|
| Alaskan Duff   | Hylocomium splendens, Sphagnum spp. | decayed vegetation matter                 |
| Black Spruce   | Picea mariana                       | branches, leaves                          |
| Chamise        | Adenostoma fasciculatum             | branches, leaves                          |
| Gallberry      | Ilex glabra                         | branches, leaves                          |
| Lodgepole Pine | Pinus contorta                      | branches, leaves                          |
| Pocosin        | Lyonia lucida, Pinus serotina       | shrub branches, leaves; dried pine litter |
| Ponderosa Pine | Pinus ponderosa                     | branches, leaves                          |
| Sage           | Artemisia tridentata                | branches, leaves                          |
| Saw Grass      | Cladium mariscus                    | leaves (grass-like)                       |
| Turkey Oak     | Quercus laevis                      | leaves                                    |
| White Spruce   | Picea glauca                        | branches, leaves                          |
| Wire Grass     | Aristida beyrichiana                | grass                                     |

### **Speciated-SOA Model**

SOA precursors (benzene, cyclodecane, m-xylene, etc) are lumped into SAPRC07 model species (9) and then allowed to react with the OH radical to form SOA as per Carlton et al. (10). The reaction is semi-empirically represented using a set of semi-volatile surrogate products in

the volatility basis set (VBS) (11). The loss of the precursor and production of semi-volatile species are described using the following equations:

$$\frac{d[X_j]}{dt} = -k_{OH,X_j}[OH][X_j] \quad (1)$$

$$\frac{d[M_i|_{g+p}]}{dt} = \sum_j \alpha_{i,j} k_{OH,X_j}[OH][X_j] \quad (2)$$

Equation (1) represents the first-generation oxidation of an SOA precursor where  $k_{OH,X}$  is the reaction rate constant between the oxidant  $[OH]$  and SOA precursor  $[X]$ . The index  $j$  indicates different precursors. Equation (2) tracks the total (gas+particle) concentration of the semi-volatile products,  $M_i|_{g+p}$ . The index  $i$  indicates different  $C^*$  bins in the VBS. The mass yields,  $\alpha_{i,j}$  are those used by Carlton et al. (10) and listed in Table S4 below. The OH concentration used to evaluate equations (1) and (2) were derived from the measured decay of individual organics. The VOC/ $NO_x$  influence on the SOA yields for speciated organics is parameterized using Presto et al. (12):

$$\alpha = \beta \alpha_{low NO_x} + (1 - \beta) \alpha_{high NO_x}$$

$$\beta = \frac{VOC}{NO_x} \Big|_{t=0} \quad \text{if} \quad \frac{VOC}{NO_x} \Big|_{t=0} < 10 \quad (3)$$

$$\beta = 1 \quad \text{if} \quad \frac{VOC}{NO_x} \Big|_{t=0} \geq 10$$

The amount of SOA at equilibrium is defined by the gas-particle partitioning of the surrogate products.

$$\xi_i = \left( 1 + \frac{C_i^*}{C_{OA}} \right)^{-1} \quad (4)$$

$$C_{OA} = \sum_{i=1}^N \xi_i \times M_i|_{g+p}$$

where,  $\xi_i$  is the fraction of mass of  $M_i|_{g+p}$  in the particulate phase,  $C_i^*$  is the effective saturation concentration of  $M_i$  and  $C_{OA}$  is the total particulate OA concentration.

Although important in the atmosphere, the model does not explicitly account for multigenerational aging because the SOA mass yields used in Carlton et al. (10) were derived from smog chamber experiments that span similar lengths in reaction times and OH exposure. Therefore, the yields in Carlton et al. (10) should account for some multi-generational aging, comparable to what occurred in our experiments.

## Measurement Uncertainty/Variability

Figure 1 indicates that there is significant variability in POA and NMOG emissions and SOA formation within each source category. This variability is mainly driven by source-to-source differences in emissions, not experimental uncertainty. The level of variability is not surprising given the diversity of sources (e.g. a fleet of 15 gasoline vehicles manufactured over a 20+ year period with different engine and emissions control technology to meet very different emissions standards). This sort of variability is apparent in any large compilation of emissions data.

Repeat experiments were performed with the same source to empirically characterize the experimental uncertainty. These results are described in detail in the companion publications. For example, May et al. (6, 7) describe the repeatability of the primary emissions for the gasoline and diesel fleet. Emissions of gas-phase pollutants typically agreed to within ~10% (relative percent difference between repeated tests for the same vehicle), while repeated measurements of particle-phase pollutants were somewhat more variable (~25%). The largest variability was observed with low emitting vehicles. Gordon et al. (2, 4) presented results from ten sets of duplicate chamber experiments. There is good agreement ( $\pm 25\%$  of the average of each duplicate pair) in SOA production for 7 of the 10 pairs of duplicate experiments. In two of the paired sets of experiments with higher experiment-to-experiment variability, the variability was due to actual differences in emissions. That vehicle had a malfunctioning oxygen sensor, which resulted in highly variable and high emissions. In other words the experiments were not true repeats. The final paired experiment with higher experiment-to-experiment variability was on a very low emitting vehicle. The bottom line is that the variability in repeat experiments with the same source is much smaller than the order of magnitude variability shown in Figure 1. Therefore, the scatter shown in Figure 1 is due to source-to-source differences, not experimental uncertainty.

For the on-road gasoline source, pre-LEV vehicles have higher POA, SOA and NMOG emissions/production than LEV-I and LEV-II vehicles and LEV-I vehicles have higher NMOG emissions than LEV-II vehicles. However, even within a given class of vehicles (e.g. LEV-I) there is a wide variation in emission rates depending on the engine/emissions control system. Except for those two, there are no trends in POA, SOA and NMOG emissions/production with engine certification (LEV-type), with vehicle size (medium-duty versus heavy-duty) or biomass fuel type (trees/pines, grasses, shrubs/duff). The biomass burning data are more variable than the on-road gasoline and on-road diesel data because of the poorly controlled nature of biomass burning and the fact that the fuel types for biomass burning were very different.

## **Model Uncertainty**

In our model, the following variables are resolved for each experiment based on measurements: composition of speciated organics, mass of unspeciated organics, OH exposure and dependency of speciated organic's SOA yields on the VOC-to-NO<sub>x</sub> ratio. For the model that simulates SOA formation from both speciated and unspeciated organics, there are two known sources of uncertainty. The first source of uncertainty comes from the assumption that the composition of the unspeciated emissions and therefore its propensity to form SOA remains the same for all sources in a given source category. This is likely a poor assumption because the composition of the speciated SOA precursors (lumped SAPRC model species) varied significantly from source to source – for example the speciated SOA precursors varied by  $\pm 57\%$  ( $\pm 1\sigma$ ) for the on-road diesel sources. It is likely that the composition of the unspeciated emissions varied by a similar amount and resulted in proportionally different amounts of SOA formation. Since our parameterization is intended to represent the average source-class behavior of the unspeciated organics, we expect it to remove the bias in the data. This is critical for chemical transport modeling and emissions inventories, which represent the behavior of emissions from a large set of sources, not an individual source. The parameterization will only eliminate the scatter if the unspeciated organics from all sources within a category are the same. We attribute much of the scatter in Figure S2 to source-to-source variability in the composition of the unspeciated organic emissions.

The second source of uncertainty comes from the SOA yields used to model SOA formation from speciated organics. A comparison of SOA yield data from published single precursor smog chamber experiments suggests that these yields are uncertain within a factor of two. Note that this factor of two accounts only for the variability in SOA yields between studies, not potential systematic biases such as loss of condensable vapors to the chamber walls (13) which have not been accounted for by smog chamber studies. To cite a few examples that illustrate the variability in single precursor data, Hildebrandt et al. (14) found that the estimated SOA mass yields for toluene from half a dozen experiments varied within a factor of two. When compared against Ng et al. (15), the average SOA mass yields were a factor of two higher. Similarly, SOA mass yields for similar experiments on naphthalene from Chan et al. (16) and Shakya and Griffin (17) vary by a factor of two. If we assume that the composition of emissions varied by  $\pm 50\%$  and the SOA yields are uncertain within a factor of two ( $\pm\sqrt{2}$ ), model predictions would have an uncertainty slightly larger than a factor of two (illustrated as a band in Figure S2).

There are several other sources of uncertainty: dependency of unspciated organic's SOA yields on the VOC-to-NO<sub>x</sub> ratio, absolute concentrations of VOCs and NO<sub>x</sub>, relative proportions of NO, NO<sub>2</sub>, RO<sub>2</sub> and HO<sub>2</sub> radicals. These are probably important in modeling SOA formation and would need to be included in future modeling efforts to explain the measured variability in SOA formation better.

Although the model predictions for an individual source are uncertain by more than a factor of two, the model predictions for the average source are less uncertain. To derive an uncertainty estimate for the average source, we fit the ratio of predicted to measured SOA for all the experiments to a lognormal distribution. For the updated model, the median ratio was 1 and the geometric standard deviation was 1.6, which corresponds to a 5 to 95% confidence interval of -40% to +60% for the average estimate. This uncertainty estimate for SOA is applied to the model prediction in Figure 4.

## **Primary PM<sub>2.5</sub> emissions**

Primary PM<sub>2.5</sub> emissions are from the National Emissions Inventory (NEI) for 2008. These emissions were speciated into primary organic carbon (POC) using profiles from EPA's SPECIATE database (18); POC was converted to POA using an organic-matter-to-organic-carbon ratio of 1.4. For off-road gasoline, residential wood combustion, and off-road diesel a single profile was used for each lumped source category. For both on-road categories, tailpipe was the largest source of PM<sub>2.5</sub> (76-96%) followed by brake wear (3-19%) and then tire wear (1-5%). On-road diesel tailpipe emissions included profiles for both heavy duty (92035) and light duty (92042) vehicle exhaust. The 2008 NEI estimated that 97% of on-road diesel PM<sub>2.5</sub> comes from heavy duty vehicles (the remainder being light duty).

The speciation profiles used in this work are listed in Table S7 and the actual speciation is in Table S8. Speciation is based on the CMAQ v5.0 AERO6 aerosol module (19).

## **NMOG emissions**

*On-road gasoline:* On-road gasoline emissions were calculated using the MOVES model. The emissions included contributions from tailpipe (65%), evaporation (24%), refueling (6%) and evaporative permeation (5%). The NMOG emissions were speciated using profiles 8750/8751 for tailpipe, 8753/8754 for evaporation, 8869/8870 for refueling and 8766/69 for evaporative permeation.

*Off-road gasoline:* Off-road gasoline vehicle emissions included contributions from tailpipe (76%), evaporative (17%) and refueling (7%). The NMOG emissions were speciated using profiles 8750/8751 for tailpipe, 8753/8754 for evaporation and 8869/8870 for refueling.

*On-road diesel:* On-road diesel emissions, also calculated with MOVES, included contributions from tailpipe (95%) and refueling (5%). The NMOG emissions were speciated using profiles 8774 for tailpipe and 4547 for refueling.

*Off-road diesel:* Off-road diesel emissions were only from tailpipe sources. All off-road diesel NMOG were speciated using profile 4674 except for agricultural tractors (SCC 2770005015) which were speciated using profile 3161. Agricultural tractors accounted for 28% of off-road diesel NMOG emissions.

*Residential wood combustion:* NMOG from residential wood combustion was speciated using one of two profiles in the emissions inventory: 4642 or 1084. Only EPA certified catalytic woodstoves (SCC 2104008230 and 2104008330) used profile 1084 and accounted for about 3% of residential wood combustion NMOG.

*Biomass burning:* Biomass burning included agricultural field burning, prescribed fires, and wildfires. The NMOG from wildfires and prescribed burns was speciated using profile 5560 while agricultural fires were speciated using profile 8746.

The speciation profiles used in this work are available in Table S7 and the actual speciation is in Table S9.

## Tables

Table S1: Comparison of the 25<sup>th</sup> to 75<sup>th</sup> percentile of POA, SOA and NMOG data between this work and literature. Our estimates compare reasonably well with those in the literature, except for our on-road gasoline and on-road diesel SOA, which are somewhat lower than previous estimates. SOA production depends on extent of oxidation (OH exposure), total mass of NMOG emissions, VOC-to-NO<sub>x</sub> ratios and OA concentrations. For example, higher SOA formation is measured from higher emitting vehicles.

| Source           | Reference                                                    | POA<br>(mg kg-fuel <sup>-1</sup> ) | SOA<br>(mg kg-fuel <sup>-1</sup> ) | NMOG<br>(mg kg-fuel <sup>-1</sup> ) |
|------------------|--------------------------------------------------------------|------------------------------------|------------------------------------|-------------------------------------|
| On-road gasoline | This work                                                    | 3.2 - 6.7                          | 20 - 67                            | 507 - 1810                          |
|                  | Platt et al. (20) - Euro 5                                   | 4.8 - 44                           | 345                                | 840 - 1750                          |
| On-road diesel   | This work                                                    | 43 - 70                            | 9.5 - 85                           | 551 - 1530                          |
|                  | Chirico et al. (21) - Light duty diesels                     | 81 - 147                           | 19 - 254                           | NA                                  |
| Biomass burning  | This work                                                    | 310 - 3310                         | 124 - 1650                         | 5760 - 35900                        |
|                  | Grieshop et al. (22),<br>Heringa et al. (23) -<br>Woodstoves | 250 - 701                          | 324 - 2050                         | NA                                  |





| Species             | 9/19/09        | 9/20/09        | 9/21/09        | 9/22/09    | 9/23/09   | 9/24/09    | 9/25/09   | 9/26/09 | 9/28/09      | 9/29/09 | 9/30/09      | 10/1/09        | 10/2/09 | 10/4/09        | 10/5/09 | 10/6/09   | 10/7/09      | 10/8/09    |
|---------------------|----------------|----------------|----------------|------------|-----------|------------|-----------|---------|--------------|---------|--------------|----------------|---------|----------------|---------|-----------|--------------|------------|
|                     | Lodgepole Pine | Lodgepole Pine | Ponderosa Pine | Wire Grass | Saw Grass | Turkey Oak | Gallberry | Sage    | Alaskan Duff | Sage    | White Spruce | Ponderosa Pine | Chamise | Lodgepole Pine | Pocosin | Gallberry | Black Spruce | Wire Grass |
| methacrolein        | 5.7E-03        | 5.7E-03        | 0.0E+00        | 2.9E-03    | 3.7E-03   | 3.8E-03    | 6.0E-03   | 6.1E-03 | 3.3E-03      | 7.3E-03 | 3.5E-03      | 4.5E-03        | 4.0E-03 | 6.5E-03        | 4.4E-03 | 4.1E-03   | 2.1E-03      | 3.3E-03    |
| methanol            | 1.2E-01        | 1.2E-01        | 3.4E-01        | 3.3E-01    | 6.8E-02   | 9.9E-02    | 1.1E-01   | 9.7E-02 | 1.3E-01      | 1.2E-01 | 1.9E-01      | 1.8E-01        | 1.7E-01 | 1.6E-01        | 1.7E-01 | 1.5E-01   | 4.5E-02      | 8.5E-03    |
| methyl ethyl ketone | 8.2E-03        | 8.2E-03        | 8.3E-03        | 8.4E-03    | 8.7E-03   | 1.1E-02    | 1.0E-02   | 8.1E-03 | 1.6E-02      | 7.2E-03 | 1.2E-02      | 1.0E-02        | 1.4E-02 | 1.1E-02        | 1.8E-02 | 2.0E-02   | 2.6E-02      | 3.9E-02    |
| methyl vinyl ketone | 1.7E-02        | 1.7E-02        | 5.6E-03        | 1.3E-02    | 2.2E-03   | 1.0E-02    | 1.5E-02   | 1.1E-02 | 8.5E-03      | 8.0E-03 | 1.1E-02      | 1.2E-02        | 1.0E-02 | 2.1E-02        | 1.8E-02 | 8.2E-03   | 7.7E-03      | 1.1E-02    |
| n-butane            | 3.3E-03        | 3.3E-03        | 5.4E-03        | 3.1E-03    | 2.4E-03   | 4.4E-03    | 9.5E-03   | 4.7E-03 | 7.1E-03      | 2.9E-03 | 4.6E-03      | 6.0E-03        | 3.5E-03 | 6.0E-03        | 1.2E-02 | 6.5E-02   | 1.4E-01      | 1.9E-01    |
| n-pentane           | 2.0E-03        | 2.0E-03        | 3.9E-03        | 3.4E-03    | 2.0E-03   | 4.3E-03    | 6.1E-03   | 3.4E-03 | 3.9E-03      | 1.7E-03 | 2.7E-03      | 2.9E-03        | 1.9E-03 | 3.3E-03        | 6.9E-03 | 6.9E-03   | 5.8E-03      | 6.1E-03    |
| propanal            | 1.2E-02        | 1.2E-02        | 1.0E-02        | 1.7E-02    | 3.3E-02   | 1.1E-02    | 1.3E-02   | 1.0E-02 | 1.5E-02      | 8.9E-03 | 1.1E-02      | 1.0E-02        | 8.0E-03 | 1.2E-02        | 1.3E-02 | 2.1E-02   | 2.4E-02      | 3.2E-02    |
| propane             | 1.3E-02        | 1.3E-02        | 3.3E-02        | 1.9E-02    | 2.4E-02   | 2.2E-02    | 3.6E-02   | 2.6E-02 | 4.0E-02      | 2.0E-02 | 2.9E-02      | 3.3E-02        | 2.3E-02 | 2.8E-02        | 4.4E-02 | 6.0E-02   | 6.8E-02      | 0.0E+00    |
| propene             | 1.0E-01        | 1.0E-01        | 5.9E-02        | 3.7E-02    | 5.5E-02   | 7.3E-02    | 8.5E-02   | 7.8E-02 | 7.7E-02      | 6.5E-02 | 6.4E-02      | 7.8E-02        | 7.0E-02 | 9.9E-02        | 9.7E-02 | 6.1E-02   | 4.9E-02      | 4.6E-02    |
| propyne             | 5.6E-03        | 5.6E-03        | 2.7E-03        | 4.3E-03    | 4.1E-03   | 8.7E-03    | 5.7E-03   | 7.2E-03 | 1.6E-03      | 6.7E-03 | 2.9E-03      | 4.0E-03        | 7.1E-03 | 6.2E-03        | 5.7E-03 | 2.6E-03   | 1.2E-03      | 2.4E-03    |
| t-2-butene          | 8.1E-03        | 8.1E-03        | 2.4E-03        | 7.8E-04    | 1.3E-03   | 4.4E-04    | 3.0E-03   | 1.7E-03 | 2.7E-03      | 1.2E-03 | 2.5E-03      | 2.6E-03        | 1.5E-03 | 2.2E-03        | 4.4E-03 | 2.4E-03   | 3.9E-03      | 0.0E+00    |
| 1-hexene            | 8.7E-04        | 8.7E-04        | 1.2E-03        | 4.7E-04    | 4.9E-04   | 5.7E-04    | 1.9E-03   | 7.2E-04 | 1.3E-03      | 5.7E-04 | 1.0E-03      | 1.4E-03        | 5.1E-04 | 2.0E-03        | 1.3E-03 | 1.5E-03   | 9.9E-04      | 0.0E+00    |
| 1-pentene           | 4.7E-03        | 4.7E-03        | 3.9E-03        | 1.6E-03    | 1.7E-03   | 6.1E-04    | 5.4E-03   | 2.7E-03 | 4.8E-03      | 2.0E-03 | 3.3E-03      | 4.0E-03        | 9.8E-04 | 1.2E-03        | 1.9E-03 | 4.1E-03   | 2.6E-03      | 0.0E+00    |
| 2-methyl-1-butene   | 1.7E-03        | 1.7E-03        | 2.0E-03        | 7.1E-04    | 8.8E-04   | 1.0E-03    | 2.3E-03   | 1.3E-03 | 1.6E-03      | 9.9E-04 | 1.8E-03      | 2.0E-03        | 8.5E-04 | 6.6E-04        | 1.2E-03 | 1.7E-03   | 9.6E-04      | 0.0E+00    |
| t-2-pentene         | 1.8E-03        | 1.8E-03        | 1.6E-03        | 8.1E-04    | 1.1E-03   | 1.2E-03    | 2.4E-03   | 1.5E-03 | 1.6E-03      | 1.1E-03 | 1.7E-03      | 1.9E-03        | 9.5E-04 | 9.2E-04        | 1.6E-03 | 1.5E-03   | 1.3E-03      | 0.0E+00    |
| styrene             | 3.4E-03        | 3.4E-03        | 1.3E-03        | 1.3E-03    | 5.9E-04   | 3.4E-03    | 2.4E-03   | 3.0E-03 | 1.5E-03      | 2.8E-03 | 2.5E-03      | 3.1E-03        | 5.1E-03 | 7.1E-03        | 3.4E-03 | 1.5E-04   | 1.6E-04      | 0.0E+00    |
| o-xylene            | 1.0E-03        | 1.0E-03        | 9.3E-04        | 3.7E-04    | 4.2E-04   | 7.3E-04    | 1.4E-03   | 8.4E-04 | 9.7E-04      | 6.8E-04 | 1.2E-03      | 1.1E-03        | 1.2E-03 | 2.2E-03        | 2.3E-03 | 9.3E-04   | 9.5E-04      | 0.0E+00    |
| decane              | 2.3E-04        | 2.3E-04        | 5.7E-04        | 2.5E-04    | 2.2E-04   | 2.6E-04    | 3.8E-04   | 4.2E-04 | 4.0E-04      | 3.6E-04 | 4.9E-04      | 4.3E-04        | 2.6E-04 | 6.1E-04        | 8.5E-04 | 1.4E-03   | 9.7E-04      | 0.0E+00    |
| camphene            | 1.4E-04        | 1.4E-04        | 5.8E-04        | 0.0E+00    | 3.2E-04   | 2.8E-04    | 0.0E+00   | 1.4E-03 | 1.6E-04      | 2.6E-03 | 7.5E-02      | 6.1E-04        | 6.6E-04 | 4.7E-04        | 3.0E-04 | 0.0E+00   | 1.3E-02      | 0.0E+00    |
| toluene             | 1.9E-02        | 1.9E-02        | 1.6E-02        | 5.9E-03    | 7.8E-03   | 1.4E-02    | 1.5E-02   | 1.5E-02 | 2.0E-02      | 1.3E-02 | 1.6E-02      | 2.1E-02        | 2.3E-02 | 2.9E-02        | 2.4E-02 | 9.1E-03   | 8.0E-03      | 6.6E-03    |

Table S3: SOA surrogates and VBS SOA mass yields (24) used for unspciated organics from different source categories.

| Source                       | SOA surrogate                            | C* ( $\mu\text{g m}^{-3}$ ) |       |      |      |
|------------------------------|------------------------------------------|-----------------------------|-------|------|------|
|                              |                                          | 0.1                         | 1     | 10   | 100  |
| Biomass burning/Wood burning | <i>n</i> -pentadecane (C <sub>15</sub> ) | 0.044                       | 0.071 | 0.41 | 0.30 |
| On- and off-road gasoline    | <i>n</i> -tridecane (C <sub>13</sub> )   | 0.014                       | 0.059 | 0.22 | 0.4  |
| On- and off-road diesel      | <i>n</i> -pentadecane (C <sub>15</sub> ) | 0.044                       | 0.071 | 0.41 | 0.30 |

Table S4: VBS SOA mass yields used in this work for the SAPRC07 species. The yields are the same as those in Carlton et al. (10) but fit to a five-product VBS.

| SAPRC07 species | High NO <sub>x</sub> (Low Yield) |        |        |        |        | Low NO <sub>x</sub> (High Yield) |
|-----------------|----------------------------------|--------|--------|--------|--------|----------------------------------|
|                 | C* ( $\mu\text{g/m}^3$ )         |        |        |        |        | C* ( $\mu\text{g/m}^3$ )         |
|                 | 0.1                              | 1      | 10     | 100    | 1000   | non-volatile                     |
| ALK5            | 0.0736                           | 0.0000 | 0.0000 | 0.0000 | 0.0000 | -                                |
| BENZ            | 0.0534                           | 0.0402 | 0.0000 | 1.0551 | 0.2386 | 0.4840                           |
| ARO1            | 0.0002                           | 0.0279 | 0.1606 | 0.0409 | 0.0000 | 0.4710                           |
| ARO2            | 0.0055                           | 0.0121 | 0.0760 | 0.0652 | 0.0000 | 0.3730                           |
| ISOP            | 0.0067                           | 0.0218 | 0.0000 | 0.2025 | 0.0654 | -                                |
| SESQ            | 0.0000                           | 0.0000 | 0.7811 | 0.9518 | 0.0000 | -                                |
| TERP            | 0.0000                           | 0.0000 | 0.0926 | 0.4488 | 0.0880 | -                                |

Table S5: NMOG totals (ton/yr) from the 2008 NEI version 3 for the United States. Obtained on September 23, 2013 from the EPA website: <http://www.epa.gov/ttn/chief/net/2008inventory.html>

| Sector                                             | NMOG emission (ton/yr) |
|----------------------------------------------------|------------------------|
| Biogenics - Vegetation and Soil                    | 38,909,250             |
| Fires - Wildfires                                  | 2,846,634              |
| Mobile - On-Road Gasoline Light Duty Vehicles      | 2,659,763              |
| Mobile - Non-Road Equipment - Gasoline             | 2,242,472              |
| Fires - Prescribed Fires                           | 1,693,249              |
| Industrial Processes - Oil & Gas Production        | 1,688,384              |
| Solvent - Consumer & Commercial Solvent Use        | 1,619,338              |
| Solvent - Industrial Surface Coating & Solvent Use | 647,913                |
| Gas Stations                                       | 643,143                |
| Solvent - Non-Industrial Surface Coating           | 429,183                |
| Fuel Comb - Residential - Wood                     | 374,612                |
| Solvent - Graphic Arts                             | 356,044                |
| Industrial Processes - Storage and Transfer        | 240,178                |
| Miscellaneous Non-Industrial NEC                   | 226,996                |
| Industrial Processes - NEC                         | 214,754                |
| Mobile - On-Road Diesel Heavy Duty Vehicles        | 212,658                |
| Solvent - Degreasing                               | 198,260                |
| Waste Disposal                                     | 180,883                |
| Mobile - On-Road Gasoline Heavy Duty Vehicles      | 169,193                |

| <b>Sector</b>                                      | <b>NMOG emission (ton/yr)</b> |
|----------------------------------------------------|-------------------------------|
| Mobile - Non-Road Equipment - Diesel               | 165,198                       |
| Industrial Processes - Pulp & Paper                | 129,910                       |
| Industrial Processes - Chemical Manuf              | 100,311                       |
| Bulk Gasoline Terminals                            | 92,800                        |
| Agriculture - Livestock Waste                      | 92,535                        |
| Industrial Processes - Petroleum Refineries        | 68,070                        |
| Fuel Comb - Industrial Boilers, ICEs - Natural Gas | 59,463                        |
| Fires - Agricultural Field Burning                 | 55,088                        |
| Solvent - Dry Cleaning                             | 48,939                        |
| Mobile - Non-Road Equipment - Other                | 46,480                        |
| Mobile – Locomotives                               | 44,198                        |
| Mobile – Aircraft                                  | 33,165                        |
| Fuel Comb - Electric Generation - Coal             | 28,676                        |
| Industrial Processes - Ferrous Metals              | 19,333                        |
| Industrial Processes - Non-ferrous Metals          | 16,213                        |
| Mobile - Commercial Marine Vessels                 | 14,406                        |
| Fuel Comb - Residential - Natural Gas              | 12,706                        |
| Commercial Cooking                                 | 12,261                        |
| Mobile - On-Road Diesel Light Duty Vehicles        | 10,190                        |
| Fuel Comb - Electric Generation - Natural Gas      | 9,335                         |
| Industrial Processes - Cement Manuf                | 9,237                         |
| Fuel Comb - Comm/Institutional - Natural Gas       | 9,177                         |
| Fuel Comb - Industrial Boilers, ICEs - Biomass     | 8,380                         |
| Fuel Comb - Industrial Boilers, ICEs - Other       | 6,358                         |
| Fuel Comb - Industrial Boilers, ICEs - Oil         | 3,838                         |
| Fuel Comb - Residential – Other                    | 2,904                         |
| Fuel Comb - Comm/Institutional - Oil               | 2,687                         |
| Fuel Comb - Electric Generation - Oil              | 2,568                         |
| Fuel Comb - Industrial Boilers, ICEs - Coal        | 2,121                         |
| Industrial Processes – Mining                      | 2,012                         |
| Fuel Comb - Electric Generation - Other            | 1,989                         |
| Fuel Comb - Residential – Oil                      | 1,743                         |
| Fuel Comb - Electric Generation - Biomass          | 1,039                         |
| Fuel Comb - Comm/Institutional - Other             | 894                           |
| Fuel Comb - Comm/Institutional - Biomass           | 535                           |
| Fuel Comb - Comm/Institutional - Coal              | 423                           |
| Dust - Construction Dust                           | 17                            |
| <b>Total</b>                                       | <b>56,668,106</b>             |

Table S6: Primary PM<sub>2.5</sub> totals (filterable and condensable in ton/yr) from the 2008 NEI version 3 for the United States. Obtained on September 23, 2013 from the EPA website: <http://www.epa.gov/ttn/chief/net/2008inventory.html>

| <b>Sector</b>                                      | <b>PM<sub>2.5</sub> emissions (ton/yr)</b> |
|----------------------------------------------------|--------------------------------------------|
| Fires – Wildfires                                  | 998,604                                    |
| Agriculture - Crops & Livestock Dust               | 923,495                                    |
| Dust - Unpaved Road Dust                           | 812,438                                    |
| Fires - Prescribed Fires                           | 696,365                                    |
| Fuel Comb - Residential - Wood                     | 352,997                                    |
| Dust - Paved Road Dust                             | 280,419                                    |
| Fuel Comb - Electric Generation - Coal             | 275,267                                    |
| Dust - Construction Dust                           | 219,923                                    |
| Waste Disposal                                     | 207,737                                    |
| Mobile - On-Road Diesel Heavy Duty Vehicles        | 160,256                                    |
| Mobile - Non-Road Equipment - Diesel               | 122,637                                    |
| Industrial Processes - NEC                         | 117,237                                    |
| Industrial Processes - Mining                      | 106,638                                    |
| Mobile - On-Road Gasoline Light Duty Vehicles      | 83,307                                     |
| Commercial Cooking                                 | 78,162                                     |
| Fires - Agricultural Field Burning                 | 67,943                                     |
| Mobile - Non-Road Equipment - Gasoline             | 57,156                                     |
| Industrial Processes - Pulp & Paper                | 40,388                                     |
| Industrial Processes - Ferrous Metals              | 35,542                                     |
| Fuel Comb - Industrial Boilers, ICEs - Biomass     | 32,059                                     |
| Fuel Comb - Industrial Boilers, ICEs - Other       | 31,233                                     |
| Fuel Comb - Industrial Boilers, ICEs - Natural Gas | 29,175                                     |
| Mobile – Locomotives                               | 25,435                                     |
| Mobile - Commercial Marine Vessels                 | 25,374                                     |
| Industrial Processes - Storage and Transfer        | 24,928                                     |
| Fuel Comb - Industrial Boilers, ICEs - Coal        | 24,223                                     |
| Industrial Processes - Petroleum Refineries        | 23,471                                     |
| Industrial Processes - Chemical Manuf              | 22,357                                     |
| Industrial Processes - Non-ferrous Metals          | 20,088                                     |
| Fuel Comb - Electric Generation - Natural Gas      | 19,891                                     |
| Industrial Processes - Cement Manuf                | 13,082                                     |
| Fuel Comb - Electric Generation - Oil              | 10,912                                     |
| Agriculture - Livestock Waste                      | 7,580                                      |
| Fuel Comb - Industrial Boilers, ICEs - Oil         | 7,276                                      |
| Industrial Processes - Oil & Gas Production        | 7,107                                      |
| Fuel Comb - Comm/Institutional - Natural Gas       | 5,922                                      |
| Fuel Comb - Residential – Oil                      | 5,866                                      |
| Fuel Comb - Residential - Natural Gas              | 5,056                                      |

| <b>Sector</b>                                      | <b>PM<sub>2.5</sub> emissions (ton/yr)</b> |
|----------------------------------------------------|--------------------------------------------|
| Mobile - On-Road Diesel Light Duty Vehicles        | 4,825                                      |
| Fuel Comb - Comm/Institutional - Oil               | 4,741                                      |
| Mobile - On-Road Gasoline Heavy Duty Vehicles      | 4,215                                      |
| Solvent - Industrial Surface Coating & Solvent Use | 3,828                                      |
| Mobile – Aircraft                                  | 3,656                                      |
| Miscellaneous Non-Industrial NEC                   | 3,181                                      |
| Fuel Comb - Comm/Institutional - Biomass           | 2,513                                      |
| Fuel Comb - Comm/Institutional - Coal              | 2,210                                      |
| Mobile - Non-Road Equipment - Other                | 2,102                                      |
| Fuel Comb - Electric Generation – Other            | 1,813                                      |
| Fuel Comb - Electric Generation - Biomass          | 1,433                                      |
| Fuel Comb - Residential – Other                    | 1,071                                      |
| Fuel Comb - Comm/Institutional – Other             | 557                                        |
| Solvent - Graphic Arts                             | 255                                        |
| Bulk Gasoline Terminals                            | 88                                         |
| Solvent – Degreasing                               | 69                                         |
| Solvent - Dry Cleaning                             | 16                                         |
| Solvent - Consumer & Commercial Solvent Use        | 13                                         |
| Gas Stations                                       | 11                                         |
| Solvent - Non-Industrial Surface Coating           | 0                                          |
| <b>Total</b>                                       | <b>6,014,143</b>                           |

Table S7: NMOG and PM<sub>2.5</sub> totals and speciation profile numbers used in SMOKE-MOVES/CMAQ for the sources and its sub-categories considered in this study.

| Source                      | NMOG Profile #                  | NMOG Emissions (Tg yr <sup>-1</sup> ) | PM <sub>2.5</sub> Profile # | POA Emissions (Tg yr <sup>-1</sup> ) |
|-----------------------------|---------------------------------|---------------------------------------|-----------------------------|--------------------------------------|
| <b>Biomass burning</b>      |                                 |                                       |                             |                                      |
| wild fires/prescribed fires | 5560                            | 4.1                                   | 92102                       | 0.99                                 |
| agricultural fires          | 8746                            | 0.04                                  | 92000                       | 0.04                                 |
| <b>Wood burning</b>         |                                 |                                       |                             |                                      |
| residential wood combustion | 4642                            | 0.3                                   | 92068                       | 0.24                                 |
| catalytic woodstoves        | 1084                            | 0.01                                  |                             |                                      |
| <b>On-road gasoline</b>     |                                 |                                       |                             |                                      |
| Tailpipe                    | 8750/51                         | 1.7                                   | 92050                       | 0.05                                 |
| evaporative/refueling       | 8753/54,<br>8869/70,<br>8766/69 | 0.9                                   | NA                          | NA                                   |
| brake/tire wear             | NA                              | NA                                    | 92009,<br>92087             | 0.005                                |
| <b>Off-road gasoline</b>    |                                 |                                       |                             |                                      |
| Tailpipe                    | 8750/51                         | 1.5                                   | 92113                       | 0.035                                |
| evaporative/refueling       | 8753/54,<br>8869/70             | 0.5                                   | NA                          | NA                                   |
| <b>On-road diesel</b>       |                                 |                                       |                             |                                      |
| Tailpipe                    | 8774                            | 0.2                                   | 92035/42                    | 0.05                                 |
| Refueling                   | 4547                            | 0.0                                   | NA                          | NA                                   |
| brake/tire wear             | NA                              | NA                                    | 92009,<br>92087             | 0.002                                |
| <b>Off-road diesel</b>      |                                 |                                       |                             |                                      |
| Tractors                    | 3161                            | 0.04                                  | 92035                       | 0.03                                 |
| Others                      | 4674                            | 0.11                                  |                             |                                      |

Table S8: PM<sub>2.5</sub> speciation profiles from the SMOKE-MOVES for the AERO6 aerosol module in CMAQ (19).

| Profile | Species | Weight Fraction |
|---------|---------|-----------------|
| 92000   | POC     | 0.388           |
| 92000   | PEC     | 0.109           |
| 92000   | PNH4    | 0.018           |
| 92000   | PNO3    | 0.0035          |
| 92000   | PSO4    | 0.0165          |
| 92000   | PNCOM   | 0.272           |
| 92000   | PNA     | 0.00655         |
| 92000   | PMG     | 8.06E-04        |

| Profile | Species | Weight Fraction |
|---------|---------|-----------------|
| 92000   | PAL     | 3.00E-04        |
| 92000   | PSI     | 1.50E-04        |
| 92000   | PCL     | 0.0905          |
| 92000   | PK      | 0.0704          |
| 92000   | PCA     | 3.30E-04        |
| 92000   | PTI     | 1.00E-05        |
| 92000   | PFE     | 1.00E-04        |
| 92000   | PMOTHR  | 0.023854        |

| Profile | Species | Weight Fraction |
|---------|---------|-----------------|
| 92000   | PMFINE  | 0.483           |
| 92009   | POC     | 0.107           |
| 92009   | PEC     | 0.0261          |
| 92009   | PNH4    | 3.00E-05        |
| 92009   | PNO3    | 0.0016          |
| 92009   | PSO4    | 0.0334          |
| 92009   | PNCOM   | 0.0428          |
| 92009   | PH2O    | 0.00802         |
| 92009   | PNA     | 1.60E-04        |
| 92009   | PMG     | 0.111           |
| 92009   | PAL     | 0.00124         |
| 92009   | PSI     | 0.088           |
| 92009   | PCL     | 0.00148         |
| 92009   | PK      | 1.90E-04        |
| 92009   | PCA     | 0.01            |
| 92009   | PTI     | 0.0036          |
| 92009   | PMN     | 0.00107         |
| 92009   | PFE     | 0.115           |
| 92009   | PMOTHR  | 0.44931         |
| 92009   | PMFINE  | 0.8319          |
| 92035   | POC     | 0.176           |
| 92035   | PEC     | 0.771           |
| 92035   | PNO3    | 0.00114         |
| 92035   | PSO4    | 0.00295         |
| 92035   | PNCOM   | 0.0439          |
| 92035   | PCL     | 2.05E-04        |
| 92035   | PK      | 3.80E-05        |
| 92035   | PCA     | 5.83E-04        |
| 92035   | PTI     | 4.00E-06        |
| 92035   | PFE     | 2.62E-04        |
| 92035   | PMOTHR  | 0.003918        |
| 92035   | PMFINE  | 0.04891         |
| 92042   | POC     | 0.355           |
| 92042   | PEC     | 0.514           |
| 92042   | PNH4    | 0.0073          |
| 92042   | PNO3    | 0.0023          |
| 92042   | PSO4    | 0.0086          |
| 92042   | PNCOM   | 0.0888          |
| 92042   | PNA     | 3.83E-04        |
| 92042   | PMG     | 1.28E-04        |
| 92042   | PAL     | 2.10E-04        |

| Profile | Species | Weight Fraction |
|---------|---------|-----------------|
| 92042   | PSI     | 0.00299         |
| 92042   | PCL     | 2.04E-04        |
| 92042   | PK      | 2.41E-05        |
| 92042   | PCA     | 2.83E-04        |
| 92042   | PMN     | 2.97E-06        |
| 92042   | PFE     | 8.80E-04        |
| 92042   | PMOTHR  | 0.018895        |
| 92042   | PMFINE  | 0.1201          |
| 92049   | POC     | 0.475           |
| 92049   | PEC     | 0.122           |
| 92049   | PNO3    | 7.00E-04        |
| 92049   | PSO4    | 5.00E-04        |
| 92049   | PNCOM   | 0.119           |
| 92049   | PSI     | 0.0012          |
| 92049   | PCA     | 3.00E-04        |
| 92049   | PFE     | 1.00E-04        |
| 92049   | PMOTHR  | 0.2812          |
| 92049   | PMFINE  | 0.4018          |
| 92050   | POC     | 0.549           |
| 92050   | PEC     | 0.19            |
| 92050   | PNH4    | 0.0167          |
| 92050   | PNO3    | 0.00151         |
| 92050   | PSO4    | 0.00808         |
| 92050   | PNCOM   | 0.137           |
| 92050   | PNA     | 0.00108         |
| 92050   | PMG     | 5.29E-04        |
| 92050   | PAL     | 0.00147         |
| 92050   | PSI     | 0.00475         |
| 92050   | PCL     | 7.96E-04        |
| 92050   | PK      | 1.81E-04        |
| 92050   | PCA     | 0.00288         |
| 92050   | PTI     | 5.54E-05        |
| 92050   | PMN     | 4.03E-05        |
| 92050   | PFE     | 0.00404         |
| 92050   | PMOTHR  | 0.081888        |
| 92050   | PMFINE  | 0.25141         |
| 92068   | POC     | 0.528           |
| 92068   | PEC     | 0.0558          |
| 92068   | PNH4    | 0.0015          |
| 92068   | PNO3    | 0.0019          |
| 92068   | PSO4    | 0.0041          |

| Profile | Species | Weight Fraction |
|---------|---------|-----------------|
| 92068   | PNCOM   | 0.37            |
| 92068   | PNA     | 9.40E-04        |
| 92068   | PMG     | 1.13E-04        |
| 92068   | PAL     | 1.10E-04        |
| 92068   | PSI     | 3.40E-04        |
| 92068   | PCL     | 0.00297         |
| 92068   | PK      | 0.00967         |
| 92068   | PCA     | 1.00E-04        |
| 92068   | PFE     | 9.00E-05        |
| 92068   | PMOTHR  | 0.024367        |
| 92068   | PMFINE  | 0.4102          |
| 92087   | POC     | 0.472           |
| 92087   | PEC     | 0.22            |
| 92087   | PNH4    | 1.90E-04        |
| 92087   | PNO3    | 0.0015          |
| 92087   | PSO4    | 0.0311          |
| 92087   | PNCOM   | 0.189           |
| 92087   | PH2O    | 0.00751         |
| 92087   | PNA     | 6.10E-04        |
| 92087   | PMG     | 3.75E-04        |
| 92087   | PAL     | 6.05E-04        |
| 92087   | PSI     | 0.00115         |
| 92087   | PCL     | 0.0078          |
| 92087   | PK      | 3.80E-04        |

| Profile | Species | Weight Fraction |
|---------|---------|-----------------|
| 92087   | PCA     | 0.00112         |
| 92087   | PTI     | 3.60E-04        |
| 92087   | PMN     | 1.00E-04        |
| 92087   | PFE     | 0.0046          |
| 92087   | PMOTHR  | 0.0616          |
| 92087   | PMFINE  | 0.2754          |
| 92090   | POC     | 0.462           |
| 92090   | PEC     | 0.0949          |
| 92090   | PNH4    | 0.00879         |
| 92090   | PNO3    | 0.00132         |
| 92090   | PSO4    | 0.0126          |
| 92090   | PNCOM   | 0.323           |
| 92090   | PNA     | 0.00573         |
| 92090   | PMG     | 3.14E-04        |
| 92090   | PAL     | 6.08E-04        |
| 92090   | PSI     | 0.00182         |
| 92090   | PCL     | 0.0415          |
| 92090   | PK      | 0.0294          |
| 92090   | PCA     | 0.00386         |
| 92090   | PTI     | 5.15E-05        |
| 92090   | PMN     | 1.60E-05        |
| 92090   | PFE     | 4.34E-04        |
| 92090   | PMOTHR  | 0.013657        |
| 92090   | PMFINE  | 0.42918         |

Table S9: TOG speciation profiles from SMOKE-MOVES for the SAPRC07 chemical mechanism in CMAQ (9, 25). In this work, we use an NMOG profile by removing methane from the TOG profile.

| Profile | Species | SAPRC07 mechanism species | Weight fraction |
|---------|---------|---------------------------|-----------------|
| 1084    | TOG     | ALK1                      | 0.0521          |
| 1084    | TOG     | ALK2                      | 0.0137          |
| 1084    | TOG     | ALK3                      | 9.09E-04        |
| 1084    | TOG     | ALK4                      | 3.72E-04        |
| 1084    | TOG     | ALK5                      | 0.0037817       |
| 1084    | TOG     | APIN                      | 2.21E-04        |
| 1084    | TOG     | ARO1                      | 4.07E-04        |
| 1084    | TOG     | ARO2                      | 6.53E-04        |
| 1084    | TOG     | B124                      | 4.50E-05        |
| 1084    | TOG     | BENZ                      | 0.1891          |

| Profile | Species | SAPRC07 mechanism species | Weight fraction |
|---------|---------|---------------------------|-----------------|
| 1084    | TOG     | CH4                       | 0.3839          |
| 1084    | TOG     | CRES                      | 3.65E-05        |
| 1084    | TOG     | ETHE                      | 0.1638          |
| 1084    | TOG     | ETOH                      | 0.1647          |
| 1084    | TOG     | MVK                       | 5.00E-06        |
| 1084    | TOG     | NROG                      | 3.18E-04        |
| 1084    | TOG     | OLE1                      | 0.0053113       |
| 1084    | TOG     | OLE2                      | 1.80E-04        |
| 1084    | TOG     | PRD2                      | 2.69E-04        |
| 1084    | TOG     | PRPE                      | 0.02            |



| Profile | Species | SAPRC07 mechanism species | Weight fraction |
|---------|---------|---------------------------|-----------------|
| 1084    | TOG     | TERP                      | 1.90E-04        |
| 3161    | TOG     | 13BDE                     | 0.0019002       |
| 3161    | TOG     | ACET                      | 0.0751          |
| 3161    | TOG     | ACYE                      | 0.0425          |
| 3161    | TOG     | ALK1                      | 0.0056999       |
| 3161    | TOG     | ALK2                      | 0.0019001       |
| 3161    | TOG     | ALK3                      | 0.017           |
| 3161    | TOG     | ALK4                      | 0.0267          |
| 3161    | TOG     | ALK5                      | 0.1047          |
| 3161    | TOG     | APIN                      | 0.0049709       |
| 3161    | TOG     | ARO1                      | 0.0182          |
| 3161    | TOG     | ARO2                      | 0.0305          |
| 3161    | TOG     | B124                      | 0.0070559       |
| 3161    | TOG     | BALD                      | 0.0069998       |
| 3161    | TOG     | BENZ                      | 0.02            |
| 3161    | TOG     | CCHO                      | 0.0735          |
| 3161    | TOG     | CH4                       | 0.0408          |
| 3161    | TOG     | CRES                      | 8.34E-04        |
| 3161    | TOG     | ETHE                      | 0.1438          |
| 3161    | TOG     | ETOH                      | 1.00E-04        |
| 3161    | TOG     | HCHO                      | 0.1471          |
| 3161    | TOG     | MEK                       | 0.0148          |
| 3161    | TOG     | MEOH                      | 3.00E-04        |
| 3161    | TOG     | MVK                       | 1.11E-04        |
| 3161    | TOG     | MXYL                      | 0.0061002       |
| 3161    | TOG     | NROG                      | 0.0071509       |
| 3161    | TOG     | OLE1                      | 0.0521          |
| 3161    | TOG     | OLE2                      | 0.0183          |
| 3161    | TOG     | OXYL                      | 0.0034005       |
| 3161    | TOG     | PRD2                      | 0.015           |
| 3161    | TOG     | PRPE                      | 0.026           |
| 3161    | TOG     | PXYL                      | 0.0010001       |
| 3161    | TOG     | RCHO                      | 0.0675          |
| 3161    | TOG     | TERP                      | 0.0042605       |
| 3161    | TOG     | TOLU                      | 0.0147          |
| 4547    | TOG     | ALK3                      | 0.3108          |
| 4547    | TOG     | ALK4                      | 0.2669          |
| 4547    | TOG     | ALK5                      | 0.2171          |
| 4547    | TOG     | APIN                      | 0.004673        |

| Profile | Species | SAPRC07 mechanism species | Weight fraction |
|---------|---------|---------------------------|-----------------|
| 4547    | TOG     | ARO1                      | 0.0188          |
| 4547    | TOG     | ARO2                      | 0.0477          |
| 4547    | TOG     | B124                      | 0.007888        |
| 4547    | TOG     | BENZ                      | 0.0040993       |
| 4547    | TOG     | CRES                      | 7.85E-04        |
| 4547    | TOG     | ISOP                      | 5.12E-04        |
| 4547    | TOG     | MVK                       | 1.04E-04        |
| 4547    | TOG     | MXYL                      | 0.0043145       |
| 4547    | TOG     | NROG                      | 0.0067217       |
| 4547    | TOG     | OLE1                      | 0.0264          |
| 4547    | TOG     | OLE2                      | 0.0515          |
| 4547    | TOG     | OXYL                      | 0.0035873       |
| 4547    | TOG     | PRD2                      | 0.0056763       |
| 4547    | TOG     | PXYL                      | 0.0043145       |
| 4547    | TOG     | TERP                      | 0.0040042       |
| 4547    | TOG     | TOLU                      | 0.0142          |
| 4642    | TOG     | 13BDE                     | 0.0061431       |
| 4642    | TOG     | ACET                      | 0.0393          |
| 4642    | TOG     | ACRO                      | 0.0033077       |
| 4642    | TOG     | ACYE                      | 0.0369          |
| 4642    | TOG     | ALK1                      | 0.0225          |
| 4642    | TOG     | ALK2                      | 0.0088734       |
| 4642    | TOG     | ALK3                      | 0.0013666       |
| 4642    | TOG     | ALK4                      | 0.0027618       |
| 4642    | TOG     | ALK5                      | 0.0034923       |
| 4642    | TOG     | APIN                      | 1.50E-04        |
| 4642    | TOG     | ARO1                      | 0.01            |
| 4642    | TOG     | ARO2                      | 0.0184          |
| 4642    | TOG     | B124                      | 3.00E-05        |
| 4642    | TOG     | BACL                      | 0.0173          |
| 4642    | TOG     | BALD                      | 0.0169          |
| 4642    | TOG     | BENZ                      | 0.0201          |
| 4642    | TOG     | CCHO                      | 0.0895          |
| 4642    | TOG     | CH4                       | 0.2163          |
| 4642    | TOG     | CRES                      | 0.1291          |
| 4642    | TOG     | ETHE                      | 0.0588          |
| 4642    | TOG     | GLY                       | 0.0352          |
| 4642    | TOG     | HCHO                      | 0.0612          |
| 4642    | TOG     | IPRD                      | 0.0145          |

| Profile | Species | SAPRC07 mechanism species | Weight fraction |
|---------|---------|---------------------------|-----------------|
| 4642    | TOG     | ISOP                      | 0.0021525       |
| 4642    | TOG     | MACR                      | 0.0012076       |
| 4642    | TOG     | MEK                       | 0.0113          |
| 4642    | TOG     | MGLY                      | 0.0495          |
| 4642    | TOG     | MVK                       | 3.33E-06        |
| 4642    | TOG     | MXYL                      | 0.0015755       |
| 4642    | TOG     | NROG                      | 2.15E-04        |
| 4642    | TOG     | NVOL                      | 1.40E-04        |
| 4642    | TOG     | OLE1                      | 0.0058554       |
| 4642    | TOG     | OLE2                      | 0.0178          |
| 4642    | TOG     | OXYL                      | 9.50E-04        |
| 4642    | TOG     | PACD                      | 5.46E-04        |
| 4642    | TOG     | PRD2                      | 1.81E-04        |
| 4642    | TOG     | PRPE                      | 0.0225          |
| 4642    | TOG     | PXYL                      | 0.0015755       |
| 4642    | TOG     | RCHO                      | 0.0641          |
| 4642    | TOG     | TERP                      | 1.27E-04        |
| 4642    | TOG     | TOLU                      | 0.0082961       |
| 4662    | TOG     | RCHO                      | 5.46E-04        |
| 4674    | TOG     | 13BDE                     | 0.001184        |
| 4674    | TOG     | ACRO                      | 0.013           |
| 4674    | TOG     | ACYE                      | 0.0176          |
| 4674    | TOG     | ALK3                      | 0.0208          |
| 4674    | TOG     | ALK4                      | 0.0454          |
| 4674    | TOG     | ALK5                      | 0.1504          |
| 4674    | TOG     | APIN                      | 0.0065917       |
| 4674    | TOG     | ARO1                      | 0.0354          |
| 4674    | TOG     | ARO2                      | 0.0363          |
| 4674    | TOG     | B124                      | 0.0047105       |
| 4674    | TOG     | BACL                      | 0.0034375       |
| 4674    | TOG     | BALD                      | 0.0302          |
| 4674    | TOG     | BENZ                      | 0.0105          |
| 4674    | TOG     | CCHO                      | 0.1596          |
| 4674    | TOG     | CRES                      | 0.0059201       |
| 4674    | TOG     | ETHE                      | 0.0327          |
| 4674    | TOG     | GLY                       | 0.00802         |
| 4674    | TOG     | HCHO                      | 0.0852          |
| 4674    | TOG     | IPRD                      | 0.0512          |
| 4674    | TOG     | MACR                      | 0.0153          |

| Profile | Species | SAPRC07 mechanism species | Weight fraction |
|---------|---------|---------------------------|-----------------|
| 4674    | TOG     | MEK                       | 0.0286          |
| 4674    | TOG     | MGLY                      | 0.0064928       |
| 4674    | TOG     | MVK                       | 1.46E-04        |
| 4674    | TOG     | MXYL                      | 0.0044494       |
| 4674    | TOG     | NROG                      | 0.0094813       |
| 4674    | TOG     | NVOL                      | 0.00293         |
| 4674    | TOG     | OLE1                      | 0.0129          |
| 4674    | TOG     | OLE2                      | 0.0165          |
| 4674    | TOG     | OXYL                      | 0.0031701       |
| 4674    | TOG     | PACD                      | 0.002949        |
| 4674    | TOG     | PRD2                      | 0.0080063       |
| 4674    | TOG     | PRPE                      | 0.0029788       |
| 4674    | TOG     | PXYL                      | 0.0044494       |
| 4674    | TOG     | RCHO                      | 0.1405          |
| 4674    | TOG     | TERP                      | 0.005648        |
| 4674    | TOG     | TOLU                      | 0.0152          |
| 4674    | TOG     | UNK                       | 0.0021625       |
| 5560    | TOG     | 13BDE                     | 0.0026493       |
| 5560    | TOG     | AACD                      | 0.1438          |
| 5560    | TOG     | ACET                      | 0.021           |
| 5560    | TOG     | ACRO                      | 0.0090828       |
| 5560    | TOG     | ACYE                      | 0.0102          |
| 5560    | TOG     | ALK1                      | 0.0237          |
| 5560    | TOG     | ALK2                      | 0.0134          |
| 5560    | TOG     | ALK3                      | 0.0034437       |
| 5560    | TOG     | ALK4                      | 0.0124          |
| 5560    | TOG     | ALK5                      | 0.0011737       |
| 5560    | TOG     | APIN                      | 0.0033309       |
| 5560    | TOG     | ARO1                      | 0.0221          |
| 5560    | TOG     | ARO2                      | 9.46E-04        |
| 5560    | TOG     | BACL                      | 0.035           |
| 5560    | TOG     | BALD                      | 0.0013626       |
| 5560    | TOG     | BENZ                      | 0.0185          |
| 5560    | TOG     | CCHO                      | 0.0189          |
| 5560    | TOG     | CH4                       | 0.1779          |
| 5560    | TOG     | CRES                      | 1.89E-04        |
| 5560    | TOG     | ETHE                      | 0.0424          |
| 5560    | TOG     | ETOH                      | 6.81E-04        |

| Profile | Species | SAPRC07 mechanism species | Weight fraction |
|---------|---------|---------------------------|-----------------|
| 5560    | TOG     | FACD                      | 0.1098          |
| 5560    | TOG     | HCHO                      | 0.0833          |
| 5560    | TOG     | ISOP                      | 0.0037846       |
| 5560    | TOG     | MEK                       | 0.0206          |
| 5560    | TOG     | MEOH                      | 0.0757          |
| 5560    | TOG     | MXYL                      | 0.0018919       |
| 5560    | TOG     | NROG                      | 0.0092044       |
| 5560    | TOG     | OLE1                      | 0.0142          |
| 5560    | TOG     | OLE2                      | 0.0135          |
| 5560    | TOG     | OXYL                      | 0.0018919       |
| 5560    | TOG     | PRPE                      | 0.0223          |
| 5560    | TOG     | PXYL                      | 0.0018919       |
| 5560    | TOG     | RCHO                      | 0.0179          |
| 5560    | TOG     | TERP                      | 0.0049957       |
| 5560    | TOG     | TOLU                      | 0.0151          |
| 5560    | TOG     | UNK                       | 0.0417          |
| 8746    | TOG     | 13BDE                     | 0.0132          |
| 8746    | TOG     | ACYE                      | 0.0142          |
| 8746    | TOG     | ALK2                      | 0.0237          |
| 8746    | TOG     | ALK3                      | 0.0107          |
| 8746    | TOG     | ALK4                      | 0.0337          |
| 8746    | TOG     | ALK5                      | 0.03            |
| 8746    | TOG     | APIN                      | 2.79E-04        |
| 8746    | TOG     | ARO1                      | 0.0031532       |
| 8746    | TOG     | ARO2                      | 0.004808        |
| 8746    | TOG     | B124                      | 0.0016043       |
| 8746    | TOG     | BACL                      | 0.0196          |
| 8746    | TOG     | BALD                      | 0.0168          |
| 8746    | TOG     | BENZ                      | 0.0186          |
| 8746    | TOG     | CCHO                      | 0.1243          |
| 8746    | TOG     | CRES                      | 2.63E-05        |
| 8746    | TOG     | ETHE                      | 0.0949          |
| 8746    | TOG     | GLY                       | 0.1974          |
| 8746    | TOG     | HCHO                      | 0.0843          |
| 8746    | TOG     | IPRD                      | 0.0066782       |
| 8746    | TOG     | ISOP                      | 0.0065631       |
| 8746    | TOG     | MACR                      | 0.0052014       |
| 8746    | TOG     | MEK                       | 0.019           |
| 8746    | TOG     | MGLY                      | 0.0828          |

| Profile | Species | SAPRC07 mechanism species | Weight fraction |
|---------|---------|---------------------------|-----------------|
| 8746    | TOG     | MVK                       | 3.33E-06        |
| 8746    | TOG     | MXYL                      | 0.0019248       |
| 8746    | TOG     | NROG                      | 2.30E-04        |
| 8746    | TOG     | OLE1                      | 0.0136          |
| 8746    | TOG     | OLE2                      | 0.0344          |
| 8746    | TOG     | OXYL                      | 0.0015521       |
| 8746    | TOG     | PRD2                      | 1.94E-04        |
| 8746    | TOG     | PRPE                      | 0.0543          |
| 8746    | TOG     | PXYL                      | 0.0019248       |
| 8746    | TOG     | RCHO                      | 0.0662          |
| 8746    | TOG     | TERP                      | 1.57E-04        |
| 8746    | TOG     | TOLU                      | 0.0139          |
| 8750    | TOG     | 13BDE                     | 0.0053598       |
| 8750    | TOG     | ACET                      | 0.0013596       |
| 8750    | TOG     | ACRO                      | 6.40E-04        |
| 8750    | TOG     | ACYE                      | 0.0301          |
| 8750    | TOG     | ALK1                      | 0.0215          |
| 8750    | TOG     | ALK2                      | 0.0026109       |
| 8750    | TOG     | ALK3                      | 0.0297          |
| 8750    | TOG     | ALK4                      | 0.1059          |
| 8750    | TOG     | ALK5                      | 0.0896          |
| 8750    | TOG     | ARO1                      | 0.0293          |
| 8750    | TOG     | ARO2                      | 0.0553          |
| 8750    | TOG     | B124                      | 0.0148          |
| 8750    | TOG     | BALD                      | 0.0052486       |
| 8750    | TOG     | BENZ                      | 0.0437          |
| 8750    | TOG     | CCHO                      | 0.0104          |
| 8750    | TOG     | CH4                       | 0.1404          |
| 8750    | TOG     | ETHE                      | 0.0548          |
| 8750    | TOG     | GLY                       | 1.23E-04        |
| 8750    | TOG     | HCHO                      | 0.0133          |
| 8750    | TOG     | IPRD                      | 2.27E-04        |
| 8750    | TOG     | MACR                      | 5.79E-04        |
| 8750    | TOG     | MEK                       | 9.55E-04        |
| 8750    | TOG     | MXYL                      | 0.0281          |
| 8750    | TOG     | OLE1                      | 0.0876          |
| 8750    | TOG     | OLE2                      | 0.0372          |
| 8750    | TOG     | OXYL                      | 0.0219          |
| 8750    | TOG     | PRPE                      | 0.037           |

| Profile | Species | SAPRC07 mechanism species | Weight fraction |
|---------|---------|---------------------------|-----------------|
| 8750    | TOG     | PXYL                      | 0.0281          |
| 8750    | TOG     | RCHO                      | 0.0067678       |
| 8750    | TOG     | TOLU                      | 0.0962          |
| 8750    | TOG     | UNK                       | 0.0013221       |
| 8751    | TOG     | 13BDE                     | 0.00521         |
| 8751    | TOG     | ACET                      | 0.0013794       |
| 8751    | TOG     | ACRO                      | 6.40E-04        |
| 8751    | TOG     | ACYE                      | 0.0305          |
| 8751    | TOG     | ALK1                      | 0.0218          |
| 8751    | TOG     | ALK2                      | 0.0026484       |
| 8751    | TOG     | ALK3                      | 0.0302          |
| 8751    | TOG     | ALK4                      | 0.1074          |
| 8751    | TOG     | ALK5                      | 0.0909          |
| 8751    | TOG     | ARO1                      | 0.0263          |
| 8751    | TOG     | ARO2                      | 0.0499          |
| 8751    | TOG     | B124                      | 0.0133          |
| 8751    | TOG     | BALD                      | 0.0047227       |
| 8751    | TOG     | BENZ                      | 0.0441          |
| 8751    | TOG     | CCHO                      | 0.0127          |
| 8751    | TOG     | CH4                       | 0.1424          |
| 8751    | TOG     | ETHE                      | 0.0556          |
| 8751    | TOG     | ETOH                      | 0.0157          |
| 8751    | TOG     | GLY                       | 1.25E-04        |
| 8751    | TOG     | HCHO                      | 0.0136          |
| 8751    | TOG     | IPRD                      | 2.31E-04        |
| 8751    | TOG     | MACR                      | 5.87E-04        |
| 8751    | TOG     | MEK                       | 9.68E-04        |
| 8751    | TOG     | MXYL                      | 0.0253          |
| 8751    | TOG     | OLE1                      | 0.0889          |
| 8751    | TOG     | OLE2                      | 0.0376          |
| 8751    | TOG     | OXYL                      | 0.0197          |
| 8751    | TOG     | PRPE                      | 0.0375          |
| 8751    | TOG     | PXYL                      | 0.0253          |
| 8751    | TOG     | RCHO                      | 0.0068648       |
| 8751    | TOG     | TOLU                      | 0.0866          |
| 8751    | TOG     | UNK                       | 0.0011905       |
| 8753    | TOG     | 13BDE                     | 0.0029571       |
| 8753    | TOG     | ALK2                      | 0.0029847       |
| 8753    | TOG     | ALK3                      | 0.3066          |

| Profile | Species | SAPRC07 mechanism species | Weight fraction |
|---------|---------|---------------------------|-----------------|
| 8753    | TOG     | ALK4                      | 0.2946          |
| 8753    | TOG     | ALK5                      | 0.0468          |
| 8753    | TOG     | ARO1                      | 0.0291          |
| 8753    | TOG     | ARO2                      | 0.0294          |
| 8753    | TOG     | B124                      | 0.0133          |
| 8753    | TOG     | BENZ                      | 0.0336          |
| 8753    | TOG     | ISOP                      | 2.93E-05        |
| 8753    | TOG     | MXYL                      | 0.0301          |
| 8753    | TOG     | OLE1                      | 0.0042276       |
| 8753    | TOG     | OLE2                      | 0.0574          |
| 8753    | TOG     | OXYL                      | 0.0208          |
| 8753    | TOG     | PXYL                      | 0.0301          |
| 8753    | TOG     | TOLU                      | 0.0978          |
| 8754    | TOG     | ALK2                      | 0.0042451       |
| 8754    | TOG     | ALK3                      | 0.2095          |
| 8754    | TOG     | ALK4                      | 0.3039          |
| 8754    | TOG     | ALK5                      | 0.038           |
| 8754    | TOG     | ARO1                      | 0.0189          |
| 8754    | TOG     | ARO2                      | 0.0175          |
| 8754    | TOG     | B124                      | 0.0093785       |
| 8754    | TOG     | BENZ                      | 0.0323          |
| 8754    | TOG     | ETOH                      | 0.1205          |
| 8754    | TOG     | ISOP                      | 1.29E-05        |
| 8754    | TOG     | MXYL                      | 0.0236          |
| 8754    | TOG     | OLE1                      | 0.0022588       |
| 8754    | TOG     | OLE2                      | 0.0332          |
| 8754    | TOG     | OXYL                      | 0.018           |
| 8754    | TOG     | PXYL                      | 0.0236          |
| 8754    | TOG     | TOLU                      | 0.1453          |
| 8757    | TOG     | 13BDE                     | 0.0089141       |
| 8757    | TOG     | ACET                      | 0.0034627       |
| 8757    | TOG     | ACRO                      | 7.23E-04        |
| 8757    | TOG     | ACYE                      | 0.0165          |
| 8757    | TOG     | ALK1                      | 0.027           |
| 8757    | TOG     | ALK2                      | 0.0015098       |
| 8757    | TOG     | ALK3                      | 0.052           |
| 8757    | TOG     | ALK4                      | 0.0882          |
| 8757    | TOG     | ALK5                      | 0.1078          |
| 8757    | TOG     | ARO1                      | 0.0331          |

| Profile | Species | SAPRC07 mechanism species | Weight fraction |
|---------|---------|---------------------------|-----------------|
| 8757    | TOG     | ARO2                      | 0.0429          |
| 8757    | TOG     | B124                      | 0.0114          |
| 8757    | TOG     | BALD                      | 0.0023709       |
| 8757    | TOG     | BENZ                      | 0.0379          |
| 8757    | TOG     | CCHO                      | 0.0161          |
| 8757    | TOG     | CH4                       | 0.1736          |
| 8757    | TOG     | ETHE                      | 0.1005          |
| 8757    | TOG     | ETOH                      | 0.0381          |
| 8757    | TOG     | HCHO                      | 0.008737        |
| 8757    | TOG     | ISOP                      | 0.0010211       |
| 8757    | TOG     | MEK                       | 1.38E-04        |
| 8757    | TOG     | MEOH                      | 0.0053635       |
| 8757    | TOG     | MXYL                      | 0.0109          |
| 8757    | TOG     | OLE1                      | 0.0129          |
| 8757    | TOG     | OLE2                      | 0.0443          |
| 8757    | TOG     | OXYL                      | 0.0278          |
| 8757    | TOG     | PRPE                      | 0.0399          |
| 8757    | TOG     | PXYL                      | 0.0109          |
| 8757    | TOG     | RCHO                      | 0.0014931       |
| 8757    | TOG     | TOLU                      | 0.0744          |
| 8762    | TOG     | 13BDE                     | 9.95E-05        |
| 8762    | TOG     | ALK2                      | 0.001462        |
| 8762    | TOG     | ALK3                      | 0.104           |
| 8762    | TOG     | ALK4                      | 0.6841          |
| 8762    | TOG     | ALK5                      | 0.0766          |
| 8762    | TOG     | APIN                      | 5.27E-04        |
| 8762    | TOG     | ARO1                      | 0.0036274       |
| 8762    | TOG     | ARO2                      | 0.0060772       |
| 8762    | TOG     | B124                      | 0.0020088       |
| 8762    | TOG     | BENZ                      | 0.0034322       |
| 8762    | TOG     | CRES                      | 8.90E-05        |
| 8762    | TOG     | ISOP                      | 1.79E-04        |
| 8762    | TOG     | MVK                       | 1.17E-05        |
| 8762    | TOG     | MXYL                      | 0.0023877       |
| 8762    | TOG     | NROG                      | 7.60E-04        |
| 8762    | TOG     | OLE1                      | 0.0097976       |
| 8762    | TOG     | OLE2                      | 0.0674          |
| 8762    | TOG     | OXYL                      | 9.85E-04        |
| 8762    | TOG     | PRD2                      | 6.41E-04        |

| Profile | Species | SAPRC07 mechanism species | Weight fraction |
|---------|---------|---------------------------|-----------------|
| 8762    | TOG     | PXYL                      | 0.0023877       |
| 8762    | TOG     | TERP                      | 4.52E-04        |
| 8762    | TOG     | TOLU                      | 0.0329          |
| 8766    | TOG     | 13BDE                     | 1.71E-04        |
| 8766    | TOG     | ALK2                      | 1.74E-04        |
| 8766    | TOG     | ALK3                      | 0.1561          |
| 8766    | TOG     | ALK4                      | 0.36            |
| 8766    | TOG     | ALK5                      | 0.1494          |
| 8766    | TOG     | APIN                      | 1.48E-04        |
| 8766    | TOG     | ARO1                      | 0.0068652       |
| 8766    | TOG     | ARO2                      | 0.0149          |
| 8766    | TOG     | B124                      | 0.0017609       |
| 8766    | TOG     | BENZ                      | 0.025           |
| 8766    | TOG     | CH4                       | 7.84E-04        |
| 8766    | TOG     | CRES                      | 2.48E-05        |
| 8766    | TOG     | ETHE                      | 3.00E-04        |
| 8766    | TOG     | ISOP                      | 3.04E-04        |
| 8766    | TOG     | MEOH                      | 6.33E-04        |
| 8766    | TOG     | MVK                       | 3.33E-06        |
| 8766    | TOG     | MXYL                      | 0.0066449       |
| 8766    | TOG     | NROG                      | 2.14E-04        |
| 8766    | TOG     | OLE1                      | 0.0128          |
| 8766    | TOG     | OLE2                      | 0.1389          |
| 8766    | TOG     | OXYL                      | 0.00341         |
| 8766    | TOG     | PRD2                      | 1.81E-04        |
| 8766    | TOG     | PXYL                      | 0.0066449       |
| 8766    | TOG     | TERP                      | 1.27E-04        |
| 8766    | TOG     | TOLU                      | 0.1146          |
| 8769    | TOG     | 13BDE                     | 0.00449         |
| 8769    | TOG     | ALK1                      | 1.07E-04        |
| 8769    | TOG     | ALK2                      | 0.0020963       |
| 8769    | TOG     | ALK3                      | 0.1008          |
| 8769    | TOG     | ALK4                      | 0.2819          |
| 8769    | TOG     | ALK5                      | 0.0822          |
| 8769    | TOG     | APIN                      | 2.15E-04        |
| 8769    | TOG     | ARO1                      | 0.0104          |
| 8769    | TOG     | ARO2                      | 0.0139          |
| 8769    | TOG     | B124                      | 0.0019905       |

| Profile | Species | SAPRC07 mechanism species | Weight fraction |
|---------|---------|---------------------------|-----------------|
| 8769    | TOG     | BENZ                      | 0.0227          |
| 8769    | TOG     | CRES                      | 3.65E-05        |
| 8769    | TOG     | ETHE                      | 1.14E-04        |
| 8769    | TOG     | ETOH                      | 0.2024          |
| 8769    | TOG     | ISOP                      | 0.0023664       |
| 8769    | TOG     | MEOH                      | 0.0044968       |
| 8769    | TOG     | MVK                       | 5.00E-06        |
| 8769    | TOG     | MXYL                      | 0.0044112       |
| 8769    | TOG     | NROG                      | 3.09E-04        |
| 8769    | TOG     | OLE1                      | 0.0168          |
| 8769    | TOG     | OLE2                      | 0.1395          |
| 8769    | TOG     | OXYL                      | 0.0025373       |
| 8769    | TOG     | PRD2                      | 2.61E-04        |
| 8769    | TOG     | PXYL                      | 0.0044112       |
| 8769    | TOG     | TERP                      | 1.83E-04        |
| 8769    | TOG     | TOLU                      | 0.1012          |
| 8774    | TOG     | 13BDE                     | 0.0085998       |
| 8774    | TOG     | ACYE                      | 0.0669          |
| 8774    | TOG     | ALK1                      | 0.0185          |
| 8774    | TOG     | ALK2                      | 0.0223          |
| 8774    | TOG     | ALK3                      | 0.0296          |
| 8774    | TOG     | ALK4                      | 0.1182          |
| 8774    | TOG     | ALK5                      | 0.0521          |
| 8774    | TOG     | APIN                      | 8.87E-04        |
| 8774    | TOG     | ARO1                      | 0.0051793       |
| 8774    | TOG     | ARO2                      | 0.0148          |
| 8774    | TOG     | B124                      | 3.29E-06        |
| 8774    | TOG     | BALD                      | 0.0061508       |
| 8774    | TOG     | BENZ                      | 0.032           |
| 8774    | TOG     | CCHO                      | 0.0557          |
| 8774    | TOG     | CRES                      | 2.56E-06        |
| 8774    | TOG     | ETHE                      | 0.2045          |
| 8774    | TOG     | GLY                       | 0.0073897       |
| 8774    | TOG     | HCHO                      | 0.0889          |
| 8774    | TOG     | IPRD                      | 0.0032003       |
| 8774    | TOG     | ISOP                      | 0.0015299       |
| 8774    | TOG     | MEK                       | 0.03            |
| 8774    | TOG     | MVK                       | 7.30E-07        |
| 8774    | TOG     | MXYL                      | 0.0031499       |

| Profile | Species | SAPRC07 mechanism species | Weight fraction |
|---------|---------|---------------------------|-----------------|
| 8774    | TOG     | NROG                      | 2.41E-05        |
| 8774    | TOG     | OLE1                      | 0.0327          |
| 8774    | TOG     | OLE2                      | 0.0957          |
| 8774    | TOG     | OXYL                      | 0.0026095       |
| 8774    | TOG     | PRD2                      | 1.97E-05        |
| 8774    | TOG     | PRPE                      | 0.0587          |
| 8774    | TOG     | PXYL                      | 0.0031499       |
| 8774    | TOG     | RCHO                      | 0.0198          |
| 8774    | TOG     | TERP                      | 3.35E-04        |
| 8774    | TOG     | TOLU                      | 0.0147          |
| 8774    | TOG     | UNK                       | 0.0028092       |
| 8869    | TOG     | ALK2                      | 0.0011806       |
| 8869    | TOG     | ALK3                      | 0.1246          |
| 8869    | TOG     | ALK4                      | 0.5431          |
| 8869    | TOG     | ALK5                      | 0.0729          |
| 8869    | TOG     | APIN                      | 5.83E-04        |
| 8869    | TOG     | ARO1                      | 0.0063553       |
| 8869    | TOG     | ARO2                      | 0.0133          |
| 8869    | TOG     | B124                      | 0.0034155       |
| 8869    | TOG     | BENZ                      | 0.0077198       |
| 8869    | TOG     | CRES                      | 9.77E-05        |
| 8869    | TOG     | ISOP                      | 2.57E-04        |
| 8869    | TOG     | MVK                       | 1.33E-05        |
| 8869    | TOG     | MXYL                      | 0.0072086       |
| 8869    | TOG     | NROG                      | 8.39E-04        |
| 8869    | TOG     | OLE1                      | 0.0183          |
| 8869    | TOG     | OLE2                      | 0.1202          |
| 8869    | TOG     | OXYL                      | 0.002945        |
| 8869    | TOG     | PRD2                      | 7.09E-04        |
| 8869    | TOG     | PXYL                      | 0.0072086       |
| 8869    | TOG     | TERP                      | 5.00E-04        |
| 8869    | TOG     | TOLU                      | 0.0687          |
| 8870    | TOG     | ALK2                      | 4.45E-04        |
| 8870    | TOG     | ALK3                      | 0.1066          |
| 8870    | TOG     | ALK4                      | 0.4469          |
| 8870    | TOG     | ALK5                      | 0.0802          |
| 8870    | TOG     | APIN                      | 0.0013146       |
| 8870    | TOG     | ARO1                      | 0.0121          |
| 8870    | TOG     | ARO2                      | 0.0339          |

| Profile | Species | SAPRC07 mechanism species | Weight fraction |
|---------|---------|---------------------------|-----------------|
| 8870    | TOG     | B124                      | 0.0094559       |
| 8870    | TOG     | BENZ                      | 0.0087095       |
| 8870    | TOG     | CRES                      | 2.20E-04        |
| 8870    | TOG     | ETOH                      | 0.0645          |
| 8870    | TOG     | ISOP                      | 2.70E-04        |
| 8870    | TOG     | MVK                       | 2.92E-05        |
| 8870    | TOG     | MXYL                      | 0.0121          |
| 8870    | TOG     | NROG                      | 0.00189         |

| Profile | Species | SAPRC07 mechanism species | Weight fraction |
|---------|---------|---------------------------|-----------------|
| 8870    | TOG     | OLE1                      | 0.0298          |
| 8870    | TOG     | OLE2                      | 0.1194          |
| 8870    | TOG     | OXYL                      | 0.0052891       |
| 8870    | TOG     | PRD2                      | 0.0015963       |
| 8870    | TOG     | PXYL                      | 0.0121          |
| 8870    | TOG     | TERP                      | 0.0011271       |
| 8870    | TOG     | TOLU                      | 0.0521          |

## Figures

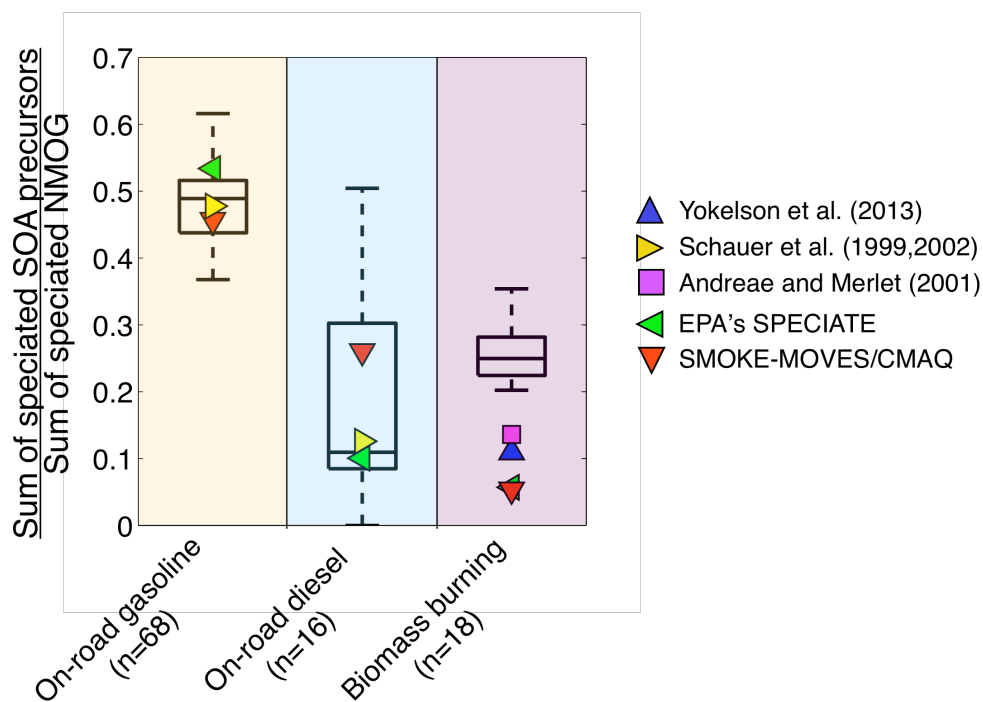

Figure S1: Box-plots for the ratio of speciated SOA precursors found in the emissions to the sum of all speciated compounds. Ratios from literature are shown using symbols (18, 26-29).

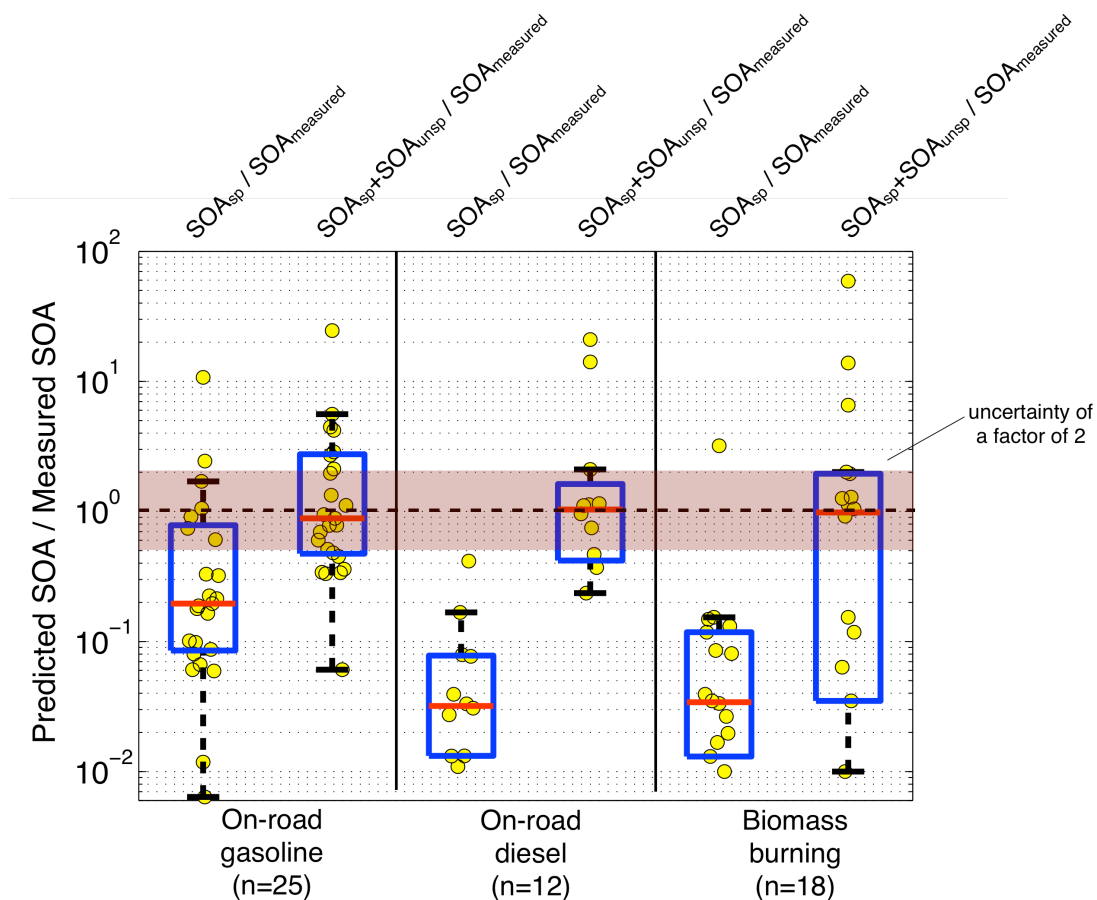

Figure S2: Ratio of predicted SOA to measured SOA for the model that included SOA formation from speciated organics only and for the model that included SOA formation from both speciated and unspeciated organics. The median model-measurement agreement is substantially improved (i.e., the bias observed for the  $SOA_{sp}/SOA_{measured}$  is eliminated) for each of the three source classes when the SOA contributions from the unspeciated precursors ( $SOA_{sp}+SOA_{unsp}/SOA_{measured}$ ) are included.



PROCESS FOR CONVERTING A SPECIATED EMISSION PROFILE TO MODEL-READY EMISSION INPUTS

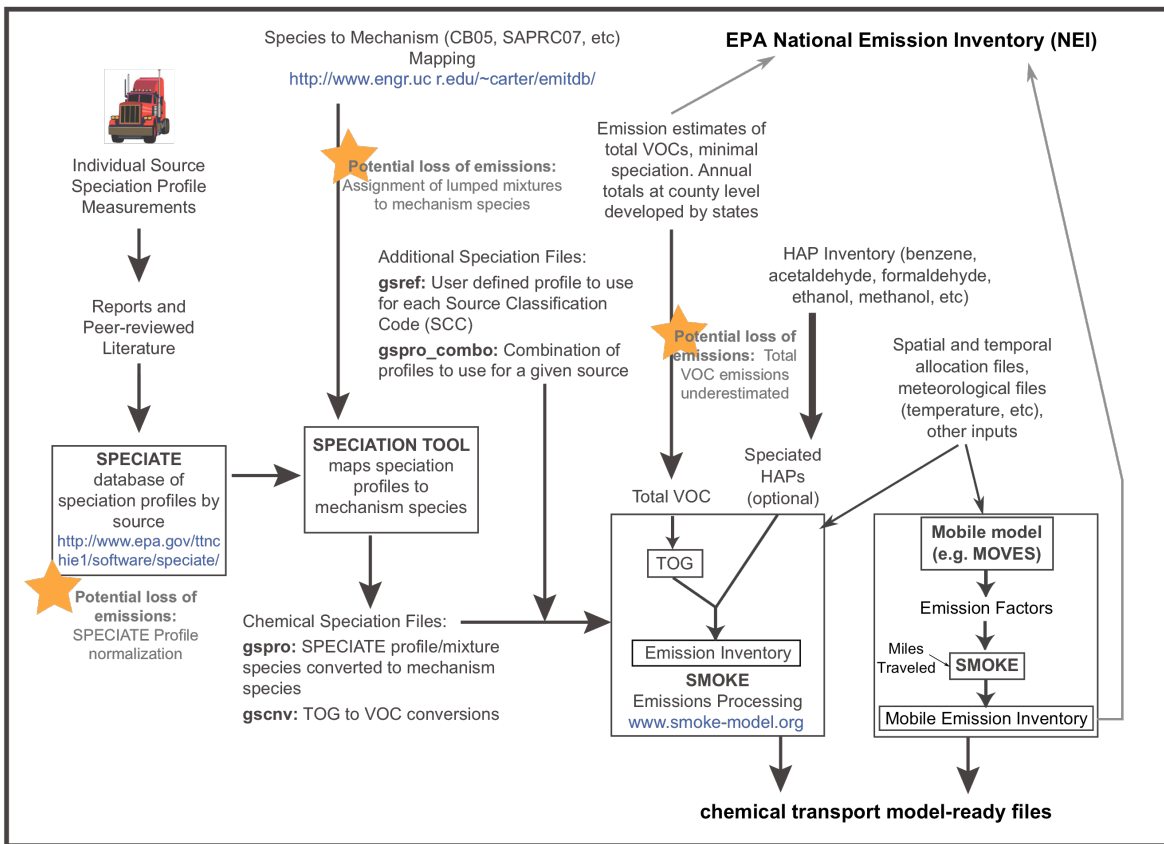

Figure S3: Schematic of emissions processing for chemical transport model-ready emissions for a model like CMAQ. Three potential losses of unspciated NMOG mass are highlighted: normalization of EPA’s SPECIATE profiles, species to mechanism mapping, and underestimation of total NMOG. Hazardous air pollutants (HAP) may either come from the HAP inventory or by speciating total NMOG from the NEI.

## References

1. Hennigan CJ, *et al.* (2011) Chemical and physical transformations of organic aerosol from the photo-oxidation of open biomass burning emissions in an environmental chamber. *Atmospheric Chemistry and Physics* 11(15):7669-7686.
2. Gordon TD, *et al.* (2014) Secondary Organic Aerosol Formed from Light Duty Gasoline Vehicle Exhaust Dominates Primary Particulate Matter Emissions. *Atmospheric Chemistry & Physics* 14(9):4461-4678.
3. Gordon TD, *et al.* (2013) Primary Gas- and Particle-Phase Emissions and Secondary Organic Aerosol Production from Gasoline and Diesel Off-Road Engines. *Environmental Science & Technology* 47(24):14137-14146.

4. Gordon TD, *et al.* (2014) Secondary organic aerosol production from diesel vehicle exhaust: impact of aftertreatment, fuel chemistry and driving cycle. *Atmospheric Chemistry & Physics* 14(9):4643-4659.
5. May AA, *et al.* (2014) Gas- and particle-phase primary emissions from in-use, on-road gasoline and diesel vehicles. *Atmospheric Environment* 88:247–260.
6. May AA, *et al.* (2013) Gas-particle partitioning of primary organic aerosol emissions: (1) gasoline vehicle exhaust. *Atmospheric Environment* 77:128-139.
7. May AA, *et al.* (2013) Gas-particle partitioning of primary organic aerosol emissions: (2) Diesel vehicles. *Environmental Science and Technology* 47(15):8288-8296.
8. May AA, *et al.* (2013) Gas-particle partitioning of primary organic aerosol emissions: 3. Biomass burning. *Journal of Geophysical Research: Atmospheres* 118(19):2013JD020286.
9. Carter WPL (2010) Development of the SAPRC-07 chemical mechanism. *Atmos. Environ.* 44(40):5324-5335.
10. Carlton AG, *et al.* (2010) Model representation of secondary organic aerosol in CMAQv4. 7. *Environmental Science & Technology* 44:8553-8560.
11. Donahue N, Robinson A, Stanier C, & Pandis S (2006) Coupled partitioning, dilution, and chemical aging of semivolatile organics. *Environ. Sci. Technol* 40(8):2635-2643.
12. Presto AA & Donahue NM (2006) Investigation of alpha-pinene+ ozone secondary organic aerosol formation at low total aerosol mass. *Environmental Science & Technology* 40(11):3536-3543.
13. Matsunaga A & Ziemann PJ (2010) Gas-wall partitioning of organic compounds in a Teflon film chamber and potential effects on reaction product and aerosol yield measurements. *Aerosol Science and Technology* 44(10):881-892.
14. Hildebrandt L, Donahue N, & Pandis S (2009) High formation of secondary organic aerosol from the photo-oxidation of toluene. *Atmospheric Chemistry and Physics* 9:2973-2986.
15. Ng N, *et al.* (2007) Secondary organic aerosol formation from m-xylene, toluene, and benzene. *Atmos. Chem. Phys* 7:3909-3922.
16. Chan AWH, *et al.* (2009) Secondary organic aerosol formation from photooxidation of naphthalene and alkylnaphthalenes: implications for oxidation of intermediate volatility organic compounds (IVOCs). *Atmospheric Chemistry and Physics* 9(9):3049-3060.
17. Shakya KM & Griffin RJ (2010) Secondary Organic Aerosol from Photooxidation of Polycyclic Aromatic Hydrocarbons. *Environmental Science & Technology* 44(21):8134-8139.
18. EPA (2013) SPECIATE Version 4.3.

19. Reff A, *et al.* (2009) Emissions Inventory of PM<sub>2.5</sub> Trace Elements across the United States. *Environmental Science & Technology* 43(15):5790-5796.
20. Platt S, *et al.* (2012) Secondary organic aerosol formation from gasoline vehicle emissions in a new mobile environmental reaction chamber. *Atmos. Chem. Phys. Discuss* 12:28343-28383.
21. Chirico R, *et al.* (2010) Impact of aftertreatment devices on primary emissions and secondary organic aerosol formation potential from in-use diesel vehicles: results from smog chamber experiments. *Atmospheric Chemistry and Physics* 10(23):11545-11563.
22. Grieshop AP, Logue JM, Donahue NM, & Robinson AL (2009) Laboratory investigation of photochemical oxidation of organic aerosol from wood fires 1: measurement and simulation of organic aerosol evolution. *Atmospheric Chemistry and Physics* 9(4):1263-1277.
23. Heringa M, *et al.* (2011) Investigations of primary and secondary particulate matter of different wood combustion appliances with a high-resolution time-of-flight aerosol mass spectrometer. *Atmospheric Chemistry and Physics* 11(12):5945-5957.
24. Presto AA, Miracolo MA, Donahue NM, & Robinson AL (2010) Secondary organic aerosol formation from high-NO<sub>x</sub> photo-oxidation of low volatility precursors: n-alkanes. *Environmental Science & Technology* 44(6):2029-2034.
25. Hutzell WT, Luecken DJ, Appel KW, & Carter WPL (2012) Interpreting predictions from the SAPRC07 mechanism based on regional and continental simulations. *Atmospheric Environment* 46(0):417-429.
26. Yokelson RJ, *et al.* (2013) Coupling field and laboratory measurements to estimate the emission factors of identified and unidentified trace gases for prescribed fires. *Atmospheric Chemistry and Physics* 13(1):89-116.
27. Andreae MO & Merlet P (2001) Emission of trace gases and aerosols from biomass burning. *Global biogeochemical cycles* 15(4):955-966.
28. Schauer JJ, Kleeman MJ, Cass GR, & Simoneit BRT (2002) Measurement of Emissions from Air Pollution Sources. 5. C<sub>1</sub>- C<sub>32</sub> Organic Compounds from Gasoline-Powered Motor Vehicles. *Environ. Sci. Technol* 36(6):1169-1180.
29. Schauer JJ, Kleeman MJ, Cass GR, & Simoneit BRT (1999) Measurement of emissions from air pollution sources. 2. C<sub>1</sub> through C<sub>30</sub> organic compounds from medium duty diesel trucks. *Environ. Sci. Technol* 33(10):1578-1587.
